# Supplementary material
Source: Springer Nature journal article supplement (https://www.springermedizin.de/resource/supplementary/13023_2012_402_MOESM2_ESM.pdf/9642278)

## Unique visitors

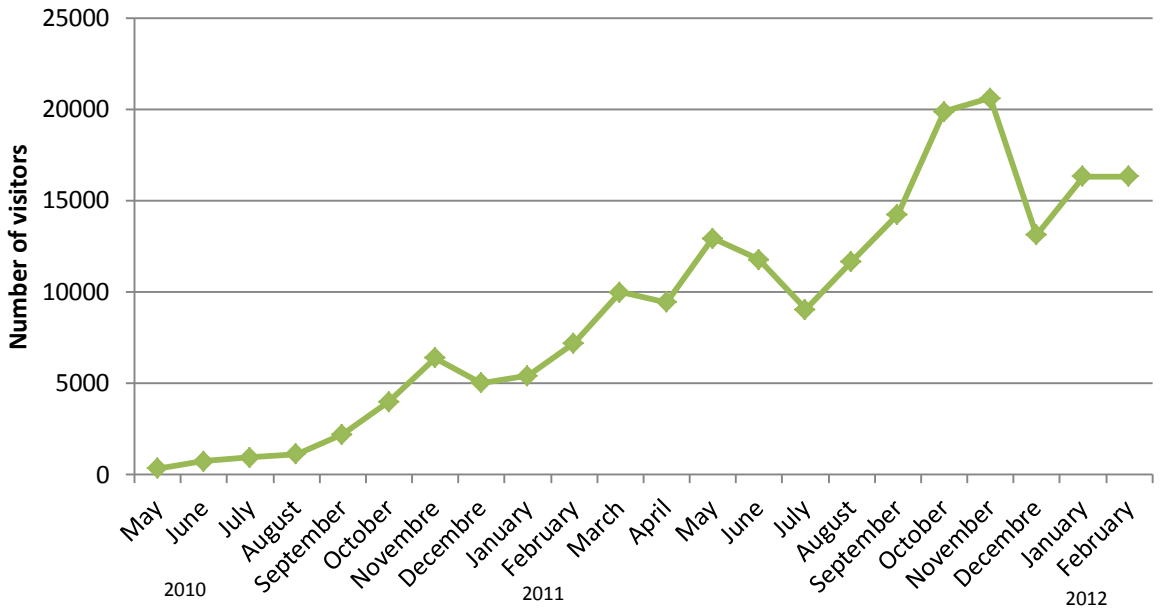

## Visits

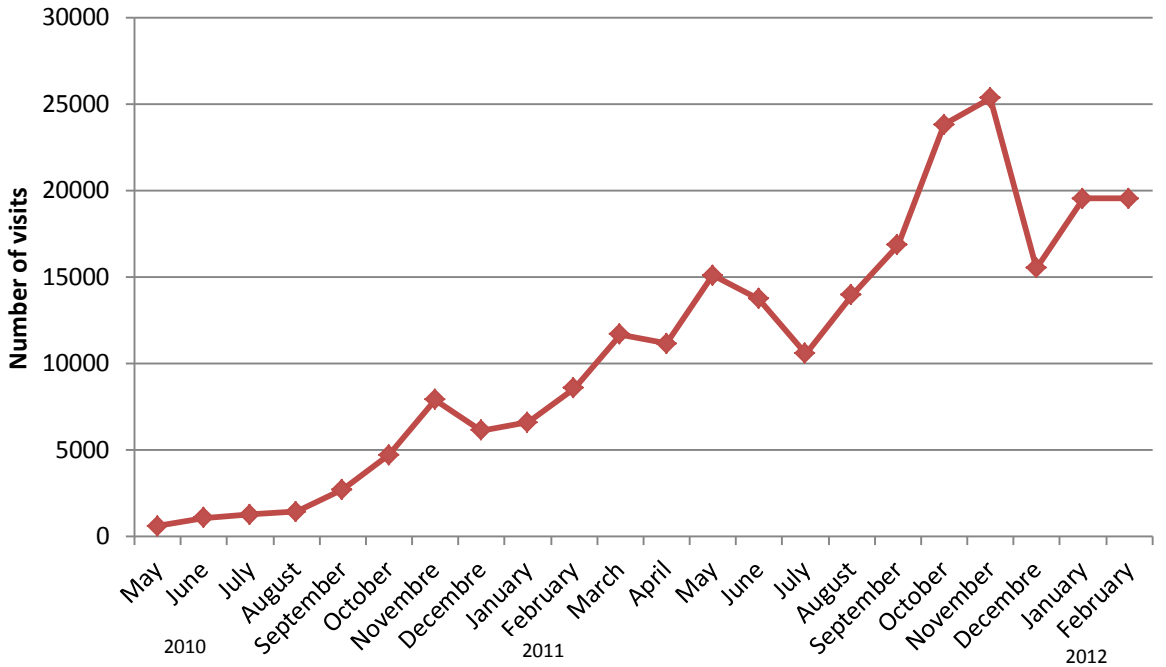

Supplement: MOESM2 [file 9642278]
